# Supplementary material for: Connected to the spirit of the frog: An Internet-based survey on Kambô, the secretion of the Amazonian Giant Maki Frog (Phyllomedusa bicolor): Motivations for use, settings and subjective experiences
Source: J Psychopharmacol. 2021 Mar 4;35(4):421–36. doi: 10.1177/0269881121991554 (PMC8058834; doi:10.1177/0269881121991554)
Supplement: sj-pdf-1-jop-10.1177_0269881121991554 – Supplemental material for Connected to the spirit of the frog: An Internet-based survey on Kambô, the secretion of the Amazonian Giant Maki Frog (Phyllomedusa bicolor): Motivations for use, settings and subjective experiences [file sj-pdf-1-jop-10.1177_0269881121991554.pdf]

## KAMBÔ SURVEY

### What's the study about?

This online survey is intended for participants who have received a Kambô treatment at least once, and designed to evaluate their experiences with this practice. In this study, we first inquire about the motivation for receiving Kambô. Furthermore, we are interested in the acute symptoms that occurred during the Kambô sessions as well as the longer-term effects of Kambô treatments. Additionally, there are some questions concerning your personal data such as your age, gender and nationality. You can skip any question you don't want to answer. Since there is only a limited amount of scientific data available on the use of Kambô, we hope to gain a better understanding of the effects and mode of action of Kambô through this study. We kindly ask you to answer the following questions as honestly and as precisely as possible. Questionnaires are anonymous, and no conclusions will be drawn specific to your person. The questionnaire will be used exclusively for this study. You can participate in this study if:

- You have received Kambô at least once in your life
- You are proficient in English
- You are 18 years of age or older

Participating will take you approximately 30 minutes. Thank you very much for taking the time to share your Kambô experiences with us!

Dr. Tomislav Majić      Dr. Timo T. Schmidt      Meike Sauter

### 1. What is your age?

... years

### 2. What is your gender?

Female

Male

Other

### 3. In which country do you live?

Free text

### 4. Please indicate your current occupational status

Employee

Freelancer

Unemployed

Student (University)

Student (Secondary School)

Apprentice

Retiree

### 5. Please indicate your total years of education (incl. secondary school, university, etc.)

... years

### 6. How old were you when you first received a Kambô treatment?

... years

### 7. Please indicate how many times you have received Kambô approximately

1x

2-4x

5-9x

10-19x

20-35x

more than 35x

### 8. Please indicate in which setting you have received Kambô and how often (multiple answers possible)

At home

At a friend's place / private space

With a natural health professional / healer

At a healing place / temple

In nature

In the Amazon rainforest

At a spiritual festival / healing festival

Within ceremony with ayahuasca or other psychedelic ritual plants (e.g. peyote, San Pedro, mushrooms, etc.)

Others:

### 9. How long ago was your last Kambô treatment?

Less than 1 week ago

week to 30 days ago

31 days to 12 months ago

1-5 years ago

More than 5 years ago

- 10. Which „ritual plants“ or „traditional indigenous medicines“ (such as ayahuasca, peyote, San Pedro, magic mushrooms, etc.) have you ever taken or take occasionally? And, how many times have you taken it in your life?**

Ayahuasca / Yage / Daime  
Peyote / San Pedro  
Psilocybin / “magic mushrooms”  
Iboga  
Bufo / 5 MeO-DMT  
Rapé / ritual tobacco  
Sananga eye drops  
Others: ...  
Never  
1x  
2-4x  
5-10x  
11-25x  
more than 25x

- 11. Which of the following substances have you ever taken or take occasionally? And, how many times have you taken it in your life?**

Alcohol (intoxication)  
Opiates (e.g., opium, heroin, morphine, etc.)  
Cannabis (e. g., hashish, marihuana)  
Cocaine  
Amphetamine (“speed”) or methamphetamine (“crystal”)  
LSD / LSA  
DMT (Dimethyltryptamine) (smoked)  
Dissociatives (e.g. ketamine, phencyclidine, PCP, dextromethorphan, DXM)  
MDMA (“ecstasy”)  
Sedatives ( e.g. “valium”) without prescription  
Tobacco (smoked)  
Others: ...  
Never  
1x  
2-4x  
5-10x  
11-25x  
more than 25x

- 12. How has the frequency of using these substances changed due to Kambô treatment?**

Never used since then  
Less frequent since then  
More frequent since then  
Unchanged since the Kambô treatment(s)  
I don't have any experience with these substances

- 13. Do you feel that Kambô induces an altered state of consciousness?**

1 = Not at all  
101 = Profoundly

- 14. How often do you engage in spiritual practice (such as meditation, yoga etc.)?**

Daily  
Weekly  
Monthly  
Rarely  
Never

- 15. Which of the following spiritual practices do you do? And for how long have you practiced?**

Yoga  
Meditation  
Prayers  
Rituals  
Mindfulness practice  
Breathing exercises  
Fasting cure  
Being silent  
Others: ...

- 16. How important is/are your spiritual practice(s) to you?**

1 = Not at all  
101 = Extraordinary important

**17. What were your personal reasons for choosing Kambô treatment? (multiple answers possible)**

Substance use disorder / Addiction  
Physical weakness and fatigue / chronic fatigue syndrome  
Alzheimer disease  
Anxiety disorder / Panic disorder  
Autoimmune disease in general  
Urogenital disorders  
Musculoskeletal system issues / back pain (e.g. intervertebral discs)  
Negative entity attachment  
High blood pressure / low blood pressure  
Lyme disease  
Chronic inflammations  
Chronic pain  
Intestinal or other parasites  
Depression  
Diabetes  
Emotional trauma (e.g. due to abuse)  
Detoxification after a period of using recreational drugs  
Weakened immune system  
Emotional imbalance  
Hepatitis  
HIV / AIDS  
Interest in "altered states of consciousness"  
Interest in spiritual experience / spiritual growth  
Physical detoxification  
Any kind of cancer  
Gastrointestinal disorders  
Manic-depressive disorder  
Multiple sclerosis  
Negative energies from other people  
Curiosity / interest in extreme experiences  
Neurodermatitis  
Impulsive behaviors  
Parkinson disease  
Family or relationship problems  
Psychosis or schizophrenia  
Rheumatological disorders  
Improvement of the senses  
Thyroid disease  
Mental / emotional purification  
Sexual dysfunction  
Infections of all kinds (viral/bacterial/fungal, e.g. candida)  
Other mental or emotional problems  
Grief (enduring, pathological)  
Improvement of overall performance  
Improvement of concentration  
Improvement of overall well-being  
Desire for general healing  
Desire to connect with the spirit of the frog  
Being part of a group in which everyone was receiving Kambô  
Obsessive-compulsive disorder (OCD)  
Others: ...

**18. What was your most important reason for receiving Kambô for the FIRST time?**

Free text

**19. Before you FIRST received Kambô, how strongly were you convinced that Kambô would have positive effects on you?**

1 = Not at all

101 = Completely convinced

**20. In the days after you FIRST received Kambô, how strongly were you convinced that Kambô had actual positive effects on you?**

1 = Not at all

101 = Completely convinced

**21. To what extent were your expectations for Kambô met after your FIRST treatment?**

1 = Not at all

101 = Exceeded all expectations

**22. How much have you benefited from your Kambô experience?**

1 = Not at all

101 = Extraordinarily

**23. In what ways have you benefitted from Kambô? (multiple answers possible)**

Relief from physical or emotional / mental health problems

Healing of diseases

Spiritual growth

Improvement of physical well-being

Improvement of concentration and mental clarity

Improved emotional health

Others: ...

1 = Not at all

101 = Extraordinarily

**IN THE FOLLOWING - UNTIL QUESTION 38 - PLEASE FOCUS ON YOUR SUBJECTIVE EXPERIENCE DURING AND AFTER ONE EXEMPLARY KAMBÔ SESSION. IT MIGHT BE A SESSION YOU REMEMBER BEST OR ONE THAT WAS ESPECIALLY MEANINGFUL TO YOU.**

**24. How long ago was this session (the one that you remember best or in retrospect was especially meaningful to you)?**

Less than 1 week ago

1 week or more ago

1 month or more ago

1 year or more ago

5 years or more ago

**25. How many "dots" of frog secretion were applied in this Kambô session (the one you remember best or in retrospect was especially meaningful to you)?**

1 2 3 4 5 6 7 8 9 10 11 12 13 14 15 16 17 18 19 20 I don't remember

**26. How did you prepare for this specific Kambô session? (the one you remember best or in retrospect was especially meaningful to you) (multiple answers possible)**

Did not prepare

Defined a certain purpose, intention or goal beforehand

Specific preparation diet

Preparation meeting / conversation with the person who gave the Kambô treatment

Meditation

Yoga

Other spiritual practices

Others: ...

**27. Before this exemplary session, did you change your nutritional practices or your intake of recreational drugs? (the session you remember best or in retrospect was especially meaningful to you)**

Yes

No

**28. For which of the following foodstuffs or recreational drugs did you reduce your consumption or disperse with entirely? (multiple answers possible)**

Meat

All kinds of animal products

Fats / oils

Raffinated Sugar

Carbohydrates

Proteins

Alcohol

Tobacco / nicotine

Caffeine

Recreational drugs

Others: ...

**29. Did you ingest any ritual plants, other traditional indigenous medicines or recreational drugs during the last 30 days preceding the session?**

Yes

No

I don't remember

**30. Please indicate which plants/medicines/substances you ingested**

Free text

**31. Please indicate the interval between this exemplary session (the one you remember best or in retrospect was especially meaningful to you) and your recent intake of „ritual plants“ or other „traditional indigenous medicines“.**

0-2 hours

3-12 hours

13-24 hours

2-7 days

8-30 days

**32. What was the setting for this exemplary Kambô session? (the one you remember best or in retrospect was especially meaningful to you) (multiple answers possible)**

At home

At a friend's place / private space  
With a natural health professional / healer  
At a healing place / temple  
In nature  
In the Amazon rainforest  
At a spiritual festival / healing festival  
Within a ceremony with ayahuasca or other psychedelic ritual plants (e.g. peyote, San Pedro, mushrooms, etc.)  
Others: ...

**33. Who gave Kambô to you in this exemplary session? (the one you remember best or in retrospect was especially meaningful to you)**

Indigenous shaman / medicine man  
Western shaman / healer / natural health professional  
A person without any special shamanic / healing training (layman)  
I gave it to myself  
Others: ...

**34. Who else was there when you received Kambô in this exemplary session? (the one you remember best or in retrospect was especially meaningful to you)**

I was the only client  
I was in a group of ... other people who also received Kambô  
I was alone and applied Kambô to myself

**35. How long did the acute process of this exemplary Kambô session (the one you remember best or in retrospect was especially meaningful to you) last? (without rest after session)**

Less than 15 minutes  
15 minutes or more  
30 minutes or more  
60 minutes or more  
90 minutes or more

**36. Which acute symptoms did you experience in this exemplary Kambô session (the one you remember best or in retrospect was especially meaningful to you)? (multiple answers possible)**

Anxiety / panic  
Fear of death  
Shortness of breath  
Stomach pains  
Loss of consciousness  
Chest pains  
Diarrhea  
Vomiting  
Joy  
Whole-body pain  
Feeling that the spirit of the frog is with me / present in myself / integrated in my being  
Feeling of oneness with everything  
Skin changes  
Racing heart  
Hot flashes / feeling of fever  
Cough  
Itching  
Headache  
Back pain  
Chills  
Swelling of the whole body  
Swelling of the trunk  
Swelling of arms / legs  
Swelling of the face  
Swelling of the throat  
Dizziness  
Sweating  
Nausea  
Abdominal pain  
Increased urination  
Desperation  
Tremors  
Others: ...

**37. Looking back on the entirety of your session, please rate the degree to which at any time during that session you experienced the following phenomena. Answer each question according to your feelings, thoughts, and experiences at the time of the session.**

Experience of amazement  
Gain of insightful knowledge experienced at an intuitive level

Feelings of tenderness and gentleness  
 Feelings of peace and tranquility  
 Sense of reverence  
 Feeling that you experienced something profoundly sacred and holy  
 Feelings of joy  
 Experience of fear  
 I felt like crying  
 Feelings of despair  
 Pressure or weight in my chest or abdomen  
 Panic  
 Despair  
     none; not at all  
     so slight cannot decide  
     slight  
     moderate  
     strong (equivalent in degree to any other strong experience)  
     extreme (more than any other time in my life)

**38. When considering the LONGER-TERM EFFECTS of this session: What was the duration in which you perceived effects? (the session you remember best or in retrospect was especially meaningful to you)**

Up to 3 days  
 4-7 days  
 8-30 days  
 1-6 months  
 7-12 months  
 More than 1 year  
 The effects are noticeable after more than one year and are still there  
 I don't remember

**IN THE FOLLOWING – UNTIL QUESTION 66 – PLEASE FOCUS ON THE OVERALL EFFECTS THAT KAMBÔ HAS HAD ON YOUR LIFE**

**39. Which positive longer-term effects has Kambô had for you from your personal viewpoint? (multiple answers possible)**

Improvement of physical health  
 Improvement of mental clarity  
 Improvement of emotional health  
 Improvement of general well-being  
 Improvement of physical issues / physical functions (e.g. digestion, pain, flexibility, decrease of skin disease, etc.)  
 Improvement of performance  
 Improvement of spiritual awareness / Increase of spiritual growth  
 I didn't notice any positive longer-term effects  
     1 = Not at all  
     101 = Very much  
 The experience has changed your philosophy of life positively  
 Your appreciation for life has increased  
 You have a greater sense of inner authority in your life  
 Your life has more meaning  
 You have more enthusiasm for life in general  
 You are a more authentic person  
 You have more goodnatured humor / playfulness / lightness  
 You have more patience / ability to tolerate frustration  
 You have more optimism  
 Your self-confidence / self-assurance has increased  
 Feelings of depression have decreased  
 Feelings of anxiety have decreased  
 You have more inner peace (i.e. centeredness, serenity, calmness)  
 You have a more positive relationship with others  
 Your negative expression of anger (e.g. ridicule, outward expression of irritability toward others) has decreased.  
 Your behavior has changed in ways you would consider positive since the experience.  
     1 = none, not at all  
     2 = so slight, cannot decide  
     3 = slight  
     4 = moderate  
     5 = strong  
     6 = extreme

**40. Which others positive longer-term effects has Kambô had for you from your personal viewpoint?**

Free text

**41. In the days after the Kambô treatment, did any previously non-existing health issues emerge?**

Yes

No

I don't know

**42. Please indicate these new physical problems.**

Free text

**43. For how long did you perceive these physical problems?**

Less than 7 days

7-30 days

More than 1 month

**44. Were these physical problems so strong and long-lasting that you saw a doctor?**

Yes

No

**45. In the days after the Kambô treatment, did any previously existing health issues become more severe, or did they re-emerge?**

Yes

No

I don't know

**46. Please indicate these well-known physical problems.**

Free text

**47. For how long did you perceive these well-known physical problems?**

Less than 7 days

7-30 days

More than 1 month

**48. Were these physical problems so strong and long-lasting that you saw a doctor?**

Yes

No

**49. In the days after the Kambô treatment, did you experience the emergence of any new mental or emotional problems?**

Yes

No

I don't know

**50. Please indicate these new mental or emotional problems.**

Free text

**51. For how long did you perceive these new mental or emotional problems?**

Less than 7 days

7-30 days

More than 1 month

**52. Were these mental or emotional problems so strong and long-lasting that you saw a doctor?**

Yes

No

**53. In the days after the Kambô treatment, was there a recurrence of any well-known mental or emotional issues?**

Yes

No

I don't know

**54. Please indicate these new mental or emotional problems.**

Free text

**55. For how long did you perceive these mental or emotional problems?**

Less than 7 days

7-30 days

More than 1 month

**56. Were these mental or emotional problems so strong and long-lasting that you saw a doctor?**

Yes

No

**57. Do you feel that Kambô has ever led to a long-lasting deterioration of your physical health?**

Yes

No

I don't know

**58. Do you feel that Kambô has ever led to a long-lasting deterioration of your mental or emotional health?**

Yes

No

I don't know

**59. After your Kambô treatment, did you change your nutritional habits or your intake of medication, alcohol, tobacco, caffeine or other recreational drugs?**

Yes

No

**60. Which of the following foodstuffs, medication, alcohol, tobacco, caffeine or other recreational drugs have you been reducing your intake or dispensing with entirely? And, for how long? (multiple answers possible)**

Meat  
Alcohol  
Tobacco / nicotine  
Medication  
Recreational drugs  
All kinds of animal products  
Fats / oils  
Raffinated Sugar  
Carbohydrates  
Proteins  
Caffeine  
Others: ...  
1-7 days  
8-30 days  
more than 30 days but not permanently  
permanent  
no changes

**61. Have you ever regretted the participation in a Kambô treatment afterwards? (Except during the Kambô session)**

Yes  
No  
I don't know

**62. How personally meaningful was the experience?**

No more than routine, everyday experiences  
Similar to meaningful experiences that occur on average once or more a week  
Similar to meaningful experiences that occur on average once a month  
Similar to meaningful experiences that occur on average once a year  
Similar to meaningful experiences that occur on average once every 5 years  
Among the 10 most meaningful experiences of my life  
Among the 5 most meaningful experiences of my life  
The single most meaningful experience of my

**63. Indicate the degree to which the experience was SPIRITUALLY significant to you.**

Not at all  
Slightly  
Moderately  
Very much  
Among the 5 most spiritually significant experiences of my life  
The single most spiritually significant experience of my life

**64. Do you believe that the experience and your contemplation of that experience have led to change in your current sense of personal well-being or life satisfaction?**

Increased very much  
Increased moderately  
Increased slightly  
No change  
Decreased slightly  
Decreased moderately  
Decreased very much

**65. To what extent does the following statement apply to you? "My life has been influenced in a lasting and profound way by Kambô"**

1 = Not at all  
101 = Extraordinarily

**66. What is the most profound effect Kambô has had on your life?**

Free text

You have made a valuable contribution to the research on Kambô! Warm thanks for taking the time to share your experience with us. We value your contribution highly. Lead investigators  
Dr. Tomislav Majić Dr. Timo T. Schmidt Meike Sauter

Questions or Comments? Contact us!
