# Supplementary material for: Connected to the spirit of the frog: An Internet-based survey on Kambô, the secretion of the Amazonian Giant Maki Frog (Phyllomedusa bicolor): Motivations for use, settings and subjective experiences
Source: PubMed Central journal article supplement (PMC8058834; doi:10.1177/0269881121991554), 2021-03-04
Supplement: sj-pdf-2-jop-10.1177_0269881121991554.pdf [file sj-pdf-2-jop-10.1177_0269881121991554.pdf]

|        | Ayahuasca    | Peyote       | Psilocybin  | Iboga        | 5MeODMT      | Rapé         | Sananga      |
|--------|--------------|--------------|-------------|--------------|--------------|--------------|--------------|
| never  | 124 (32.12%) | 187 (48.45%) | 88 (22.80%) | 258 (66.84%) | 233 (60.36%) | 85 (22.02%)  | 148 (38.34%) |
| 1x     | 31 (8.03%)   | 51 (13.21%)  | 32 (8.29%)  | 21(5.44%)    | 26 (6.74%)   | 38 (9.84%)   | 50 (12.95%)  |
| 2-4x   | 73 (18.91%)  | 57 (14.77%)  | 71 (18.39%) | 8 (2.07%)    | 33 (8.55%)   | 63 (16.32%)  | 52 (13.47%)  |
| 5-10x  | 51 (13.21%)  | 21 (5.44%)   | 70 (18.13%) | 2 (0.52%)    | 8 (2.07%)    | 41 (10.62%)  | 35 (9.07%)   |
| 11-25x | 35 (9.07%)   | 6 (1.55%)    | 49 (12.69%) | 0 (0.00%)    | 3 (0.78%)    | 25 (6.48%)   | 24 (6.22%)   |
| >25x   | 49 (12.69%)  | 9 (2.33%)    | 51 (13.21%) | 2 (0.59%)    | 2 (0.52%)    | 112 (29.02%) | 30 (7.77%)   |

  

|        | Alcohol      | Opiates      | Cannabis     | Cocaine      | (Meth)amphetamine | LSD/LSA      |
|--------|--------------|--------------|--------------|--------------|-------------------|--------------|
| never  | 30 (7.77%)   | 238 (61.66%) | 17 (4.40%)   | 118 (30.57%) | 161 (41.71%)      | 108 (27.98%) |
| 1x     | 10 (2.59%)   | 29 (7.51%)   | 14 (3.63%)   | 31 (8.03%)   | 34 (8.81%)        | 37 (9.59%)   |
| 2-4x   | 33 (8.55%)   | 47 (12.18%)  | 36 (9.33%)   | 56 (14.51%)  | 38 (9.84%)        | 63 (16.32%)  |
| 5-10x  | 27 (6.99%)   | 14 (3.63%)   | 27 (6.99%)   | 44 (11.40%)  | 32 (8.29%)        | 55 (14.25%)  |
| 11-25x | 27 (6.99%)   | 8 (2.07%)    | 33 (8.55%)   | 37 (9.59%)   | 30 (7.77%)        | 56 (14.51%)  |
| >25x   | 257 (66.58%) | 26 (6.74%)   | 258 (66.84%) | 75 (19.43%)  | 75 (19.43%)       | 55 (14.25%)  |

  

|        | DMT          | Dissociatives | MDMA        | Sedatives    | Tobacco      | Others      |
|--------|--------------|---------------|-------------|--------------|--------------|-------------|
| never  | 201 (52.07%) | 202 (52.33%)  | 92 (23.83%) | 229 (59.33%) | 49 (12.69%)  | 64 (16.58%) |
| 1x     | 50 (12.95%)  | 39 (10.10%)   | 28 (7.25%)  | 29 (7.51%)   | 14 (3.63%)   | 5 (1.30%)   |
| 2-4x   | 50 (12.95%)  | 43 (11.14%)   | 42 (10.88%) | 35 (9.07%)   | 34 (8.81%)   | 8 (2.07%)   |
| 5-10x  | 30 (7.77%)   | 21 (5.44%)    | 60 (15.54%) | 21 (5.44%)   | 14 (3.63%)   | 6 (1.55%)   |
| 11-25x | 17 (4.40%)   | 8 (2.07%)     | 55 (14.25%) | 9 (2.33%)    | 11 (2.85%)   | 3 (0.78%)   |
| >25x   | 13 (3.37%)   | 42 (10.88%)   | 97 (25.13%) | 33 (8.55%)   | 255 (66.06%) | 12 (3.11%)  |

**Supplementary Table S2: Use of ritual plants and substances during lifetime**

By using the response option “others”, participants additionally reported the use of “salvia divinorium” (n=4) and “phenethylamine” (n=5), as most common responses.
